# Supplementary material for: Assessing the impact of aggregating disease stage data in model predictions of human African trypanosomiasis transmission and control activities in Bandundu province (DRC)
Source: PLOS journal article supplement (doi:10.1371/journal.pntd.0007976), 2020-01-21
Supplement: S5 (10.1371/journal.pntd.0007976.s005) [file journal.pntd.0007976.s005]

**S1 Table. Probability of elimination (zero transmission) by 2030 with a weaker threshold**

Table 3 in the main text gives the probability of elimination (zero transmission) by 2030 for the threshold of <1 new infection per 1,000,000. Due to the deterministic nature of all four models, a defined threshold is necessary since solutions approach zero but never reach zero. The table below shows the probability of achieving elimination using an alternative (weaker) threshold of <1 new transmission per 100,000. As expected for this threshold, there is a higher probability of the elimination target being met, although only Model I predicts elimination is likely with the baseline strategy. All models now predict elimination with vector control. Models S and Y predict that elimination is not feasible with enhanced passive detection (EPD), while Models I and W find elimination is possible in most of their fits.

| Fit           | Strategy |                |       | Model |
|---------------|----------|----------------|-------|-------|
|               | Baseline | Vector Control | EPD   |       |
| Unstaged      | 1        | 1              | 1     | I     |
| Staged        | 0.692    | 1              | 0.665 |       |
| Subset staged | 1        | 1              | 1     |       |
| Unstaged      | 0        | 1              | 0     | S     |
| Staged        | 0        | 1              | 0     |       |
| Subset staged | 0        | 1              | 0.05  |       |
| Unstaged      | 0        | 1              | 0.024 | W     |
| Staged        | 0.039    | 1              | 1     |       |
| Subset staged | 0        | 1              | 0.474 |       |
| Unstaged      | 0        | 1              | 0     | Y     |
| Staged        | 0        | 1              | 0     |       |
| Subset staged | 0.003    | 1              | 0.003 |       |

Probability of different strategies achieving elimination by 2030 defined as <1 new transmission per 100,000 people. In all cases, 1000 simulations (i.e. different parameter sets) were used.
